# Supplementary material for: Facile preparation of β-/γ-MgH2 nanocomposites under mild conditions and pathways to rapid dehydrogenation
Source: Royal Society of Chemistry journal article supplement (doi:10.1039/c5cp07762a), 2016-01-01
Supplement: c5cp07762a1.pdf [file c5cp07762a1.pdf]

## Facile Preparation of $\beta$ -/ $\gamma$ -MgH<sub>2</sub> Nanocomposites under Mild Conditions and Pathways to Rapid Dehydrogenation.

### Supplementary Information

Xuezhang Xiao,<sup>a,b</sup> Zhe Liu,<sup>a</sup> Sina Saremi-Yarahmadi,<sup>a</sup> Duncan H. Gregory<sup>a\*</sup>

**Table S1(a) Refined atomic parameters of  $\gamma$ -MgH<sub>2</sub> phase**

| atom  | site | x      | y          | Z      | $U_{\text{iso}} \times 100 / \text{\AA}^2$ |
|-------|------|--------|------------|--------|--------------------------------------------|
| Mg(1) | 4c   | 0      | 0.3483(11) | ¼      | 7.6(5)                                     |
| H(1)  | 8d   | 0.7710 | 0.6085     | 0.4199 | 3.8                                        |

<sup>a</sup> Space group *Pbcn*,  $a = 4.4399(10) \text{\AA}$ ,  $b = 5.4090(13) \text{\AA}$ ,  $c = 4.8804(5) \text{\AA}$

**Table S1(b) Refined atomic parameters of  $\beta$ -MgH<sub>2</sub> Phase**

| atom  | site | x      | y      | Z | $U_{\text{iso}} \times 100 / \text{\AA}^2$ |
|-------|------|--------|--------|---|--------------------------------------------|
| Mg(1) | 2a   | 0      | 0      | 0 | 1.79(6)                                    |
| H(1)  | 4f   | 0.3168 | 0.3168 | 0 | 3.4                                        |

<sup>a</sup> Space group *P4<sub>2</sub>/m n m*,  $a = 4.5111(3) \text{\AA}$ ,  $c = 3.0162(6) \text{\AA}$

**Table S1(c) Refined atomic parameter of Mg Phase**

| atom  | site | x   | y   | z   | $U_{\text{iso}} \times 100 / \text{\AA}^2$ |
|-------|------|-----|-----|-----|--------------------------------------------|
| Mg(1) | 2c   | 1/3 | 2/3 | 1/4 | 8.1                                        |

<sup>a</sup> Space group *P6<sub>3</sub>/m m c*,  $a = 3.2073(6) \text{\AA}$ ,  $c = 5.2005(17) \text{\AA}$

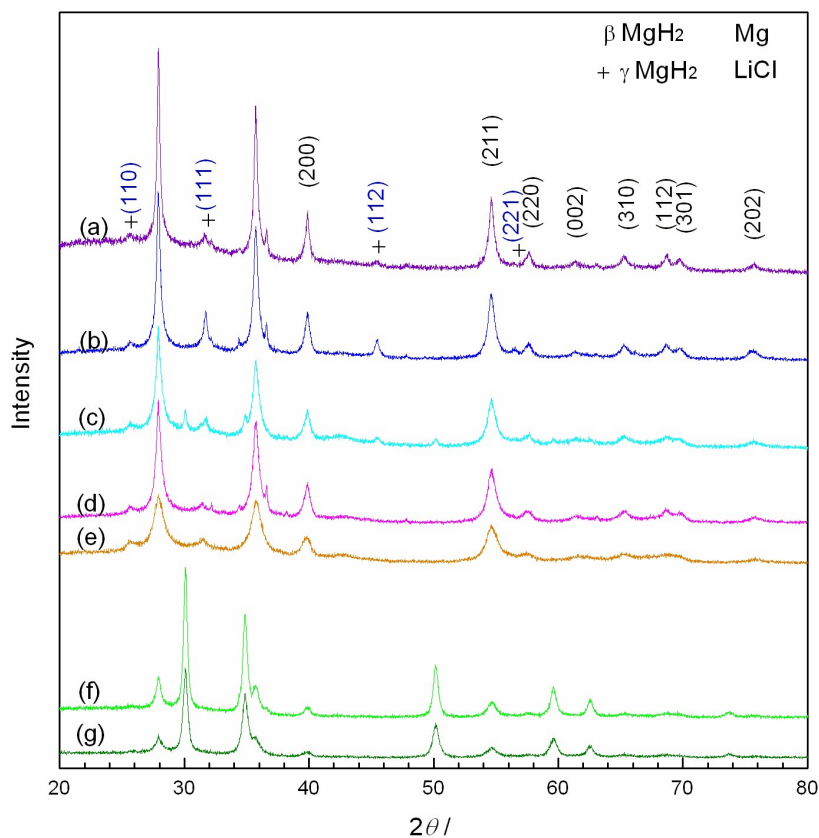

**Fig. S1** PXD patterns of  $\beta$ -/ $\gamma$ -MgH<sub>2</sub> prepared under different conditions: (a) ball milled for 1 h with LiCl added and washed with THF; (b) ball milled for 4 h with LiCl added and washed with THF; (c) ball milled for 6 h with LiCl added and washed with THF; (d) ball milled for 2 h and washed with THF; (e) ball milled for 4 h and washed with THF; (f) ball milled for 2 h with LiCl added; (g) ball milled for 4 h with LiCl added.
